# Supplementary material for: Targeting ubiquitin-specific protease 8 sensitizes anti-programmed death-ligand 1 immunotherapy of pancreatic cancer
Source: PubMed Central journal article supplement (PMC9950432; doi:10.1038/s41418-022-01102-z), 2022-12-20

Fig. 1g

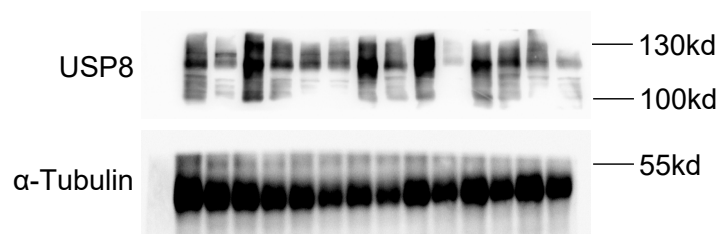

Fig. 1i

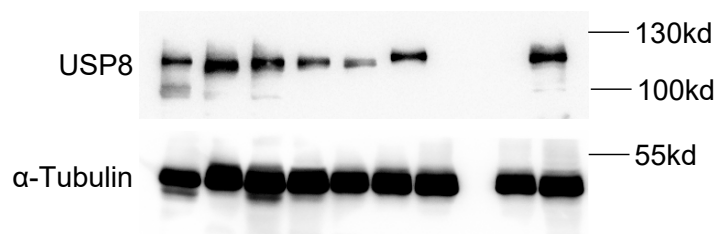

Fig. 3e

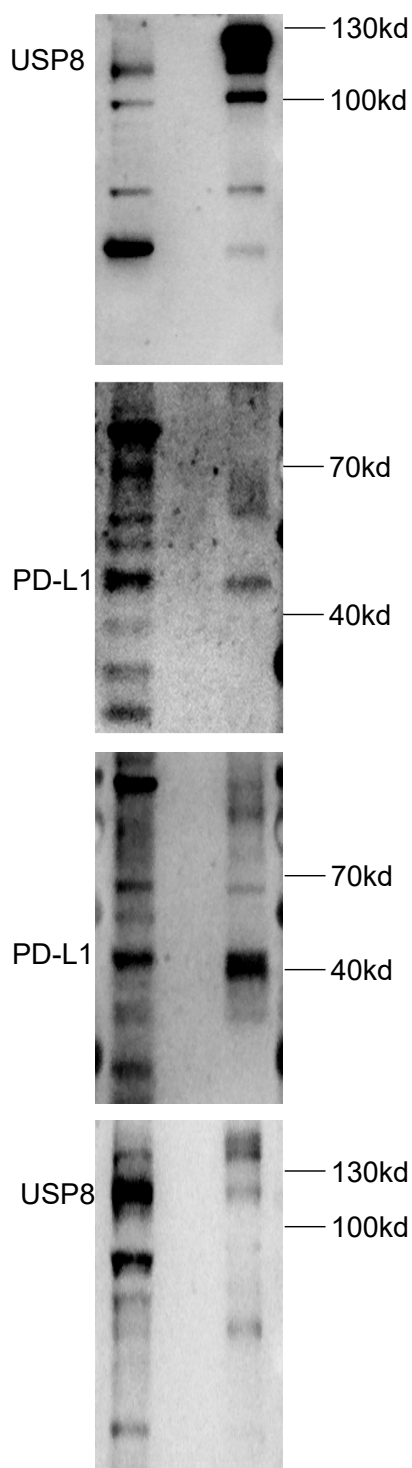

Fig. 3f

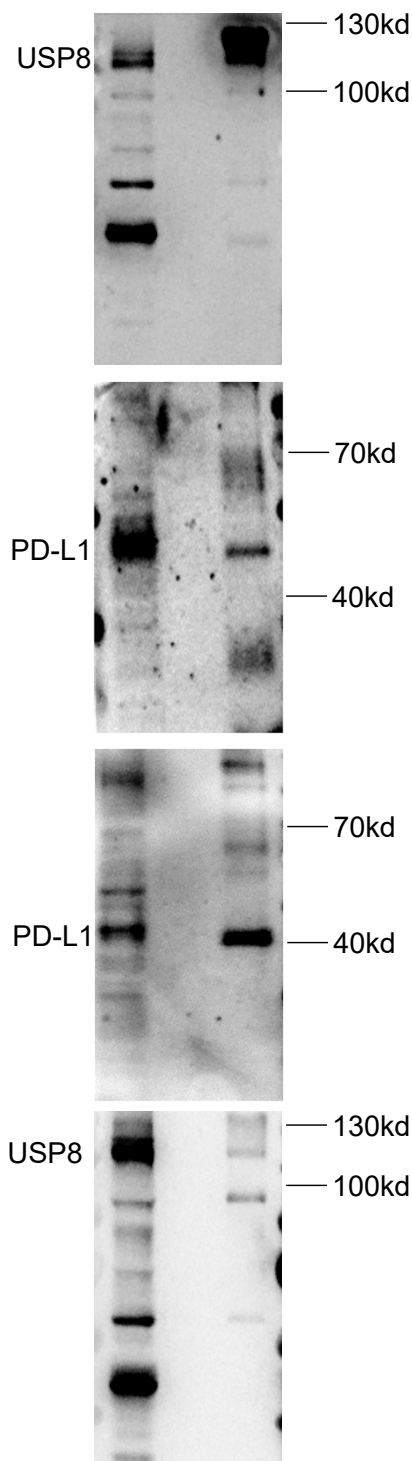

Fig. 3g

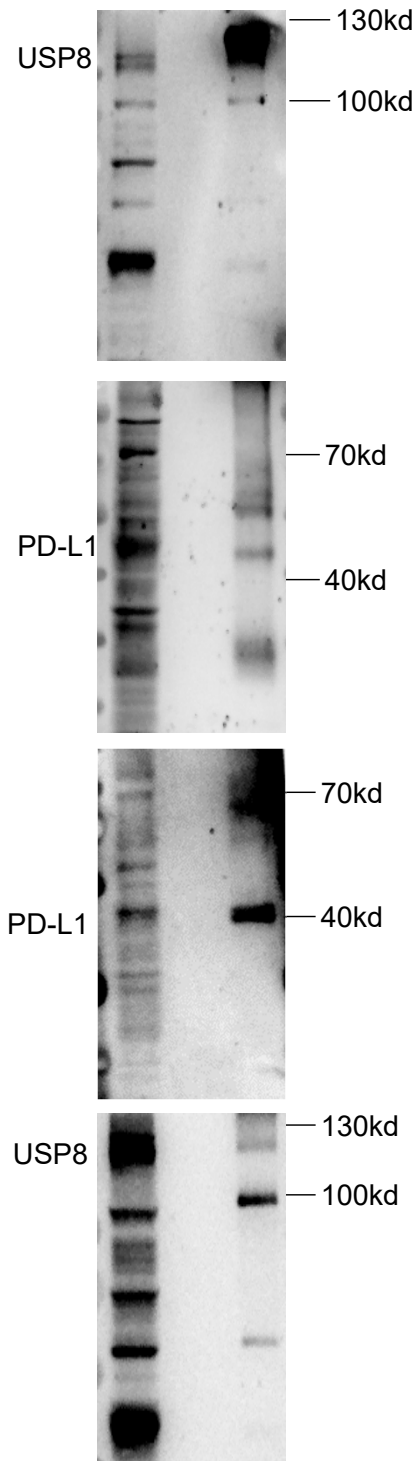

Fig. 3h

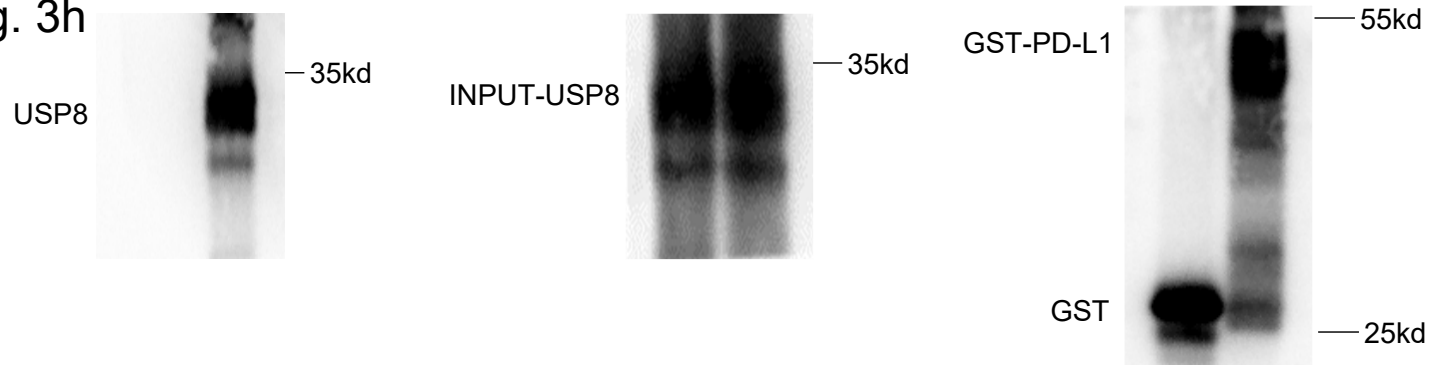

Fig. 3

**Fig. 4a**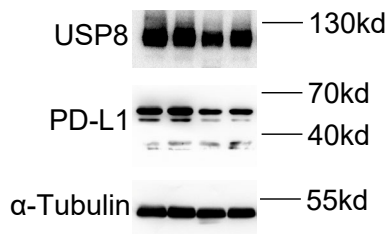**Fig. 4b**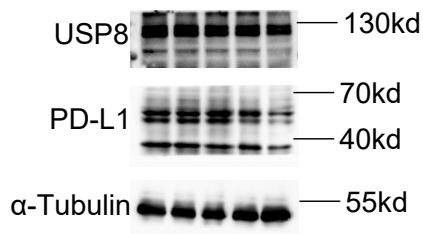**Fig. 4c**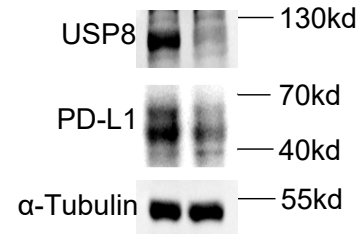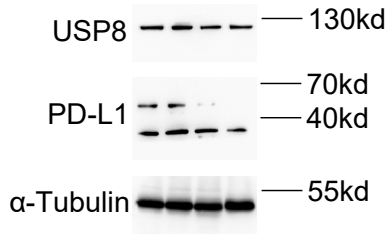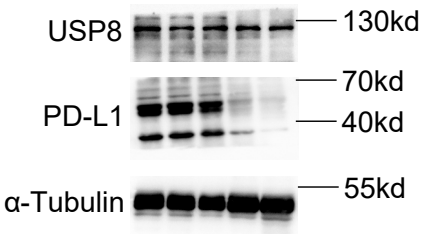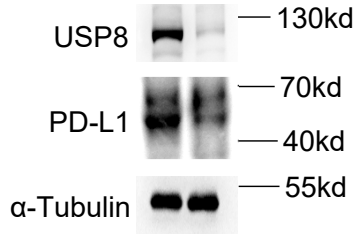**Fig. 4h**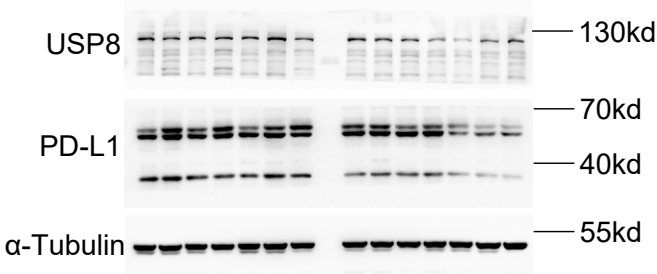**Fig. 4m**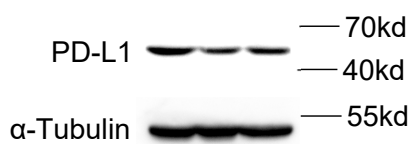**Fig. 4n**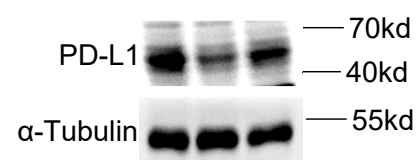**Fig. 4o**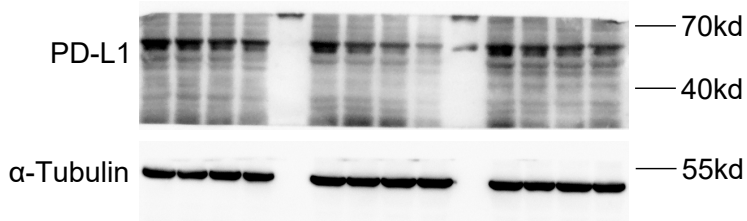**Fig. 4p**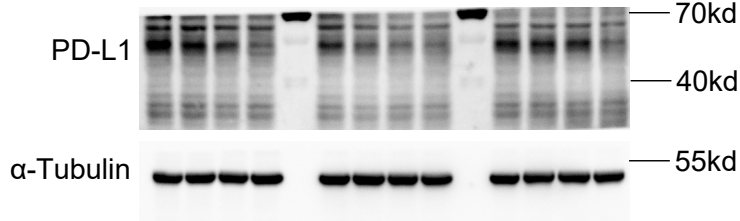**Fig. 4s**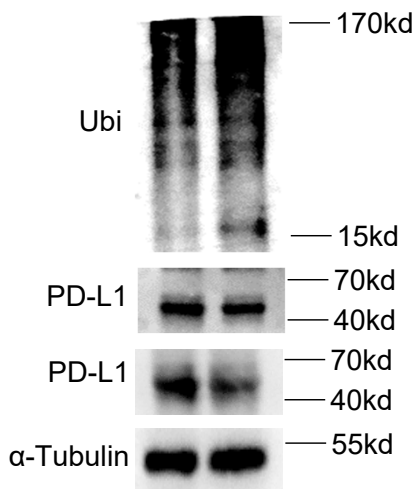**Fig. 4t**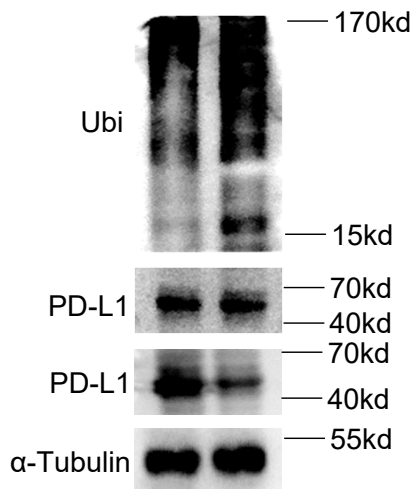

Fig. 5g

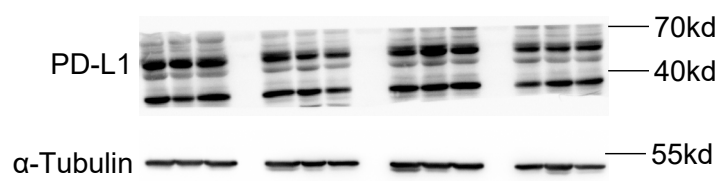

Fig. 8a

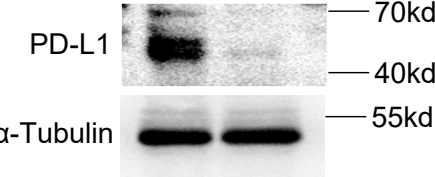

Fig. S2e

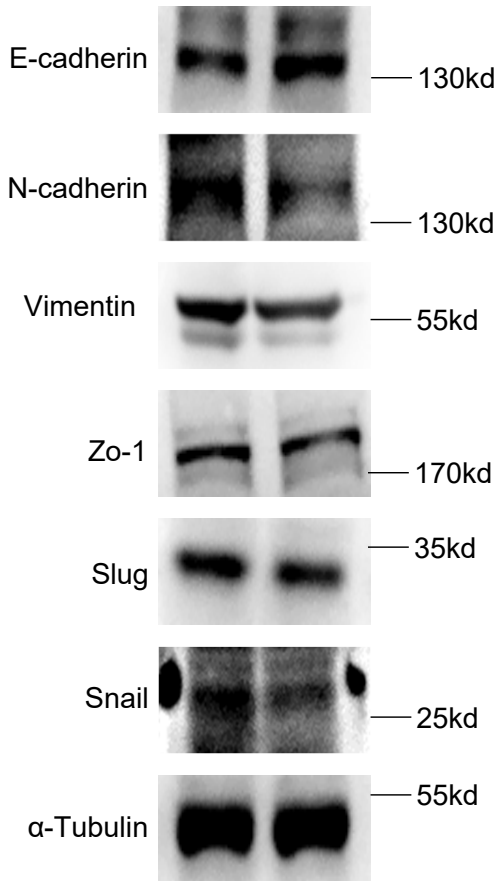

Fig. S2f

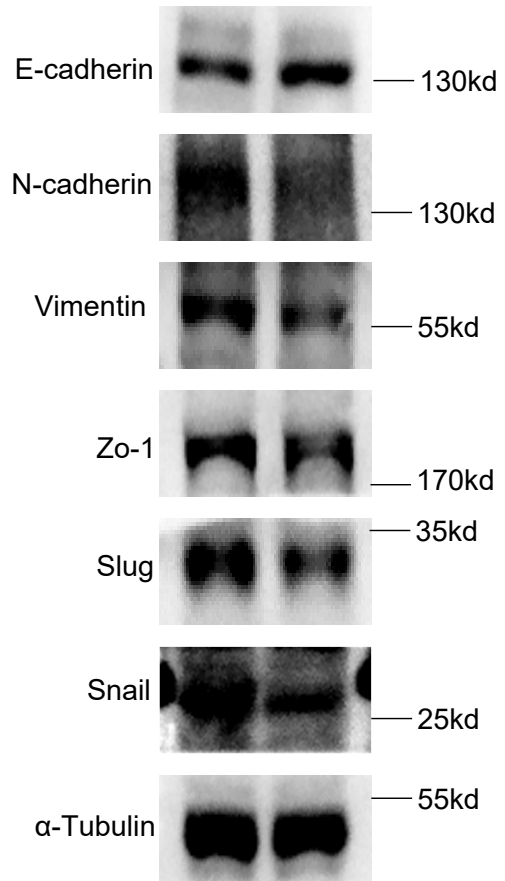

Fig. S5a

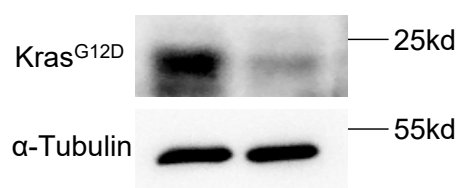

Fig. S7a

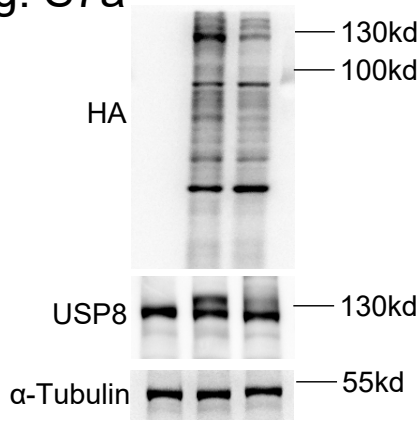

Fig. S7b

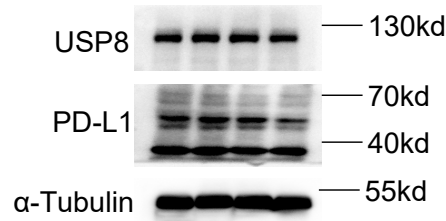

Fig. S7c

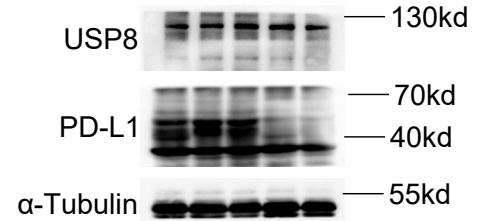

Fig. S7d

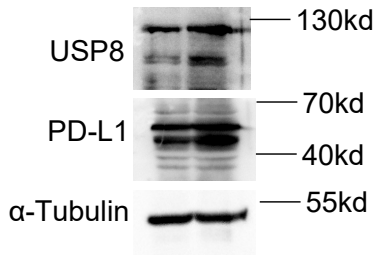

Fig. S7f

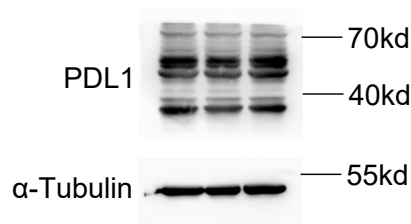

Fig. S7g

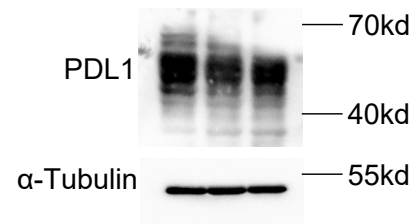

Fig. S7h

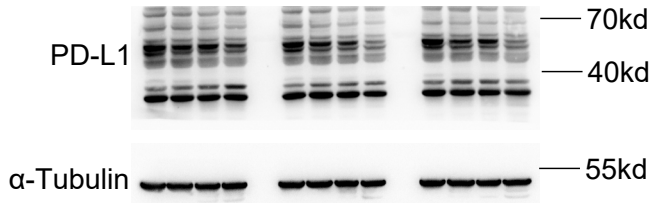

Fig. S7i

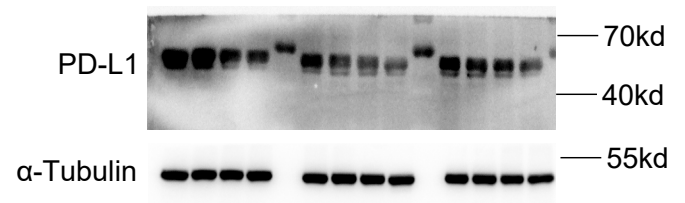

Fig. S7l

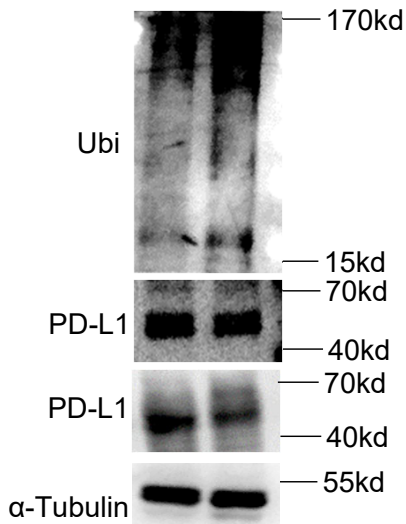

Fig. S7m

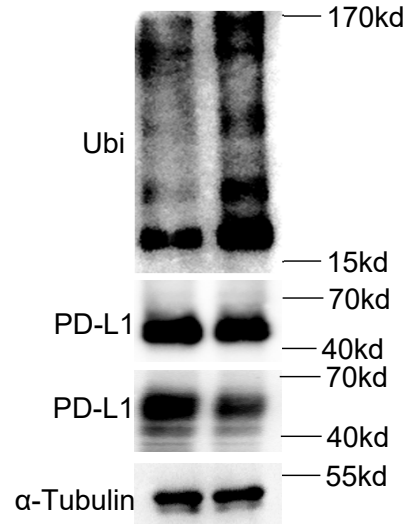



Fig. S8a

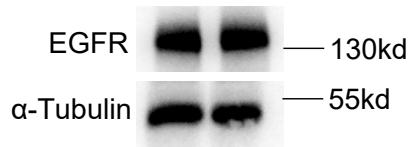

Fig. S8b

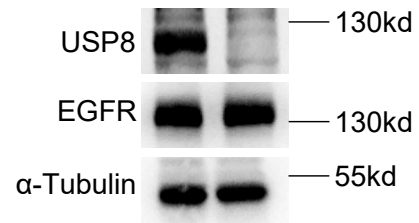

Fig. S8c

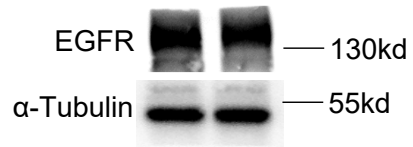

Fig. S8d

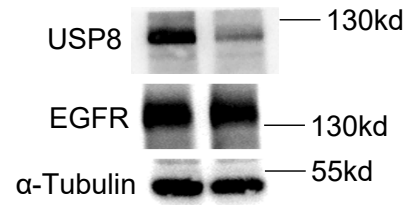

Fig. S8e

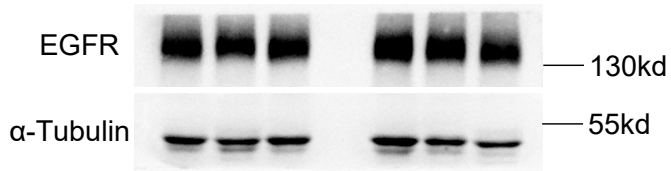

Fig. S11e

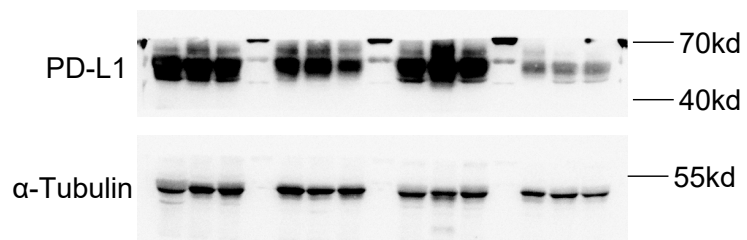

Supplement: 41418_2022_1102_MOESM19_ESM.pdf [file 41418_2022_1102_MOESM19_ESM.pdf]
